# Supplementary material for: What Mn Kβ spectroscopy reveals concerning the oxidation states of the Mn cluster in photosystem II
Source: Royal Society of Chemistry journal article supplement (doi:10.1039/c7cp04797e), 2017-01-01
Supplement: c7cp04797e1.pdf [file c7cp04797e1.pdf]

**Supplementary Material for**  
**What Mn  $K_{\beta}$  Spectroscopy Reveals Concerning the Oxidation States of  
the Mn Cluster in Photosystem II**

*Simon Petrie, Rob Stranger\* and Ron J. Pace\**

## Section S1: Model Compound Descriptions

**Table S1:** Model Mn compound data of Dau et al., [17], showing oxidation states, ligand environment and  $K\beta_{1,3} \langle E \rangle$  and  $E_0$  values. Compounds 1-8 are mono or di-Metal ( $Mn_2$  or  $Mn,Fe$ ) Mn complexes (see [17], with representative structures given in Fig. S1 below). Compounds 9-11 are Mn oxides (indicated), with  $O_6$  ligation. Compound 12 is a tetra Mn complex, with mainly O ligation (see [17]). Most Mn co-ordination is sixfold, but compound 5 is penta co-ordinate.

| Compound <sup>[a]</sup> | Ox. States(s)         | Ligands                    | $\langle E \rangle$ eV | $E_0$ <sup>[b]</sup> eV |
|-------------------------|-----------------------|----------------------------|------------------------|-------------------------|
| 1                       | (II) <sub>2</sub>     | $Mn^{II}O_2N_4$            | 6491.49                | 6492.44                 |
| 2                       | (III) <sub>2</sub>    | $Mn^{III}O_6$              | 6490.86                | 6491.97                 |
| 3                       | (III)                 | $Mn^{III}O_5N$             | 6490.85                | 6492.03                 |
| 4                       | (III) <sub>2</sub>    | $Mn^{III}O_4N_2$           | 6490.96                | 6492.14                 |
| 5                       | (III)                 | $Mn^{III}O_3N_2$           | 6490.82                | 6491.82                 |
| 6                       | (IV)                  | $Mn^{IV}O_4N_2$            | 6490.33                | 6491.08                 |
| 7                       | (IV)                  | $Mn^{IV}O_3N_3$            | 6490.33                | 6491.14                 |
| 8                       | (IV) <sub>2</sub>     | $Mn^{IV}O_3N_3$            | 6490.40                | 6491.06                 |
| 9                       | (III)                 | $Mn^{III}_2O_3$            | 6490.97                | 6491.88                 |
| 10                      | (IV)                  | $Mn^{IV}O_2$               | 6490.25                | 6491.26                 |
| 11                      | (II)                  | $Mn^{II}O$                 | 6491.38                | 6492.34                 |
| 12                      | (III-II) <sub>2</sub> | $(Mn^{II}Mn^{III})_2O_9Cl$ | 6491.24                | 6492.34                 |

[a] As listed by Dau [17]. [b] Estimated from Fig. S4 in [17].

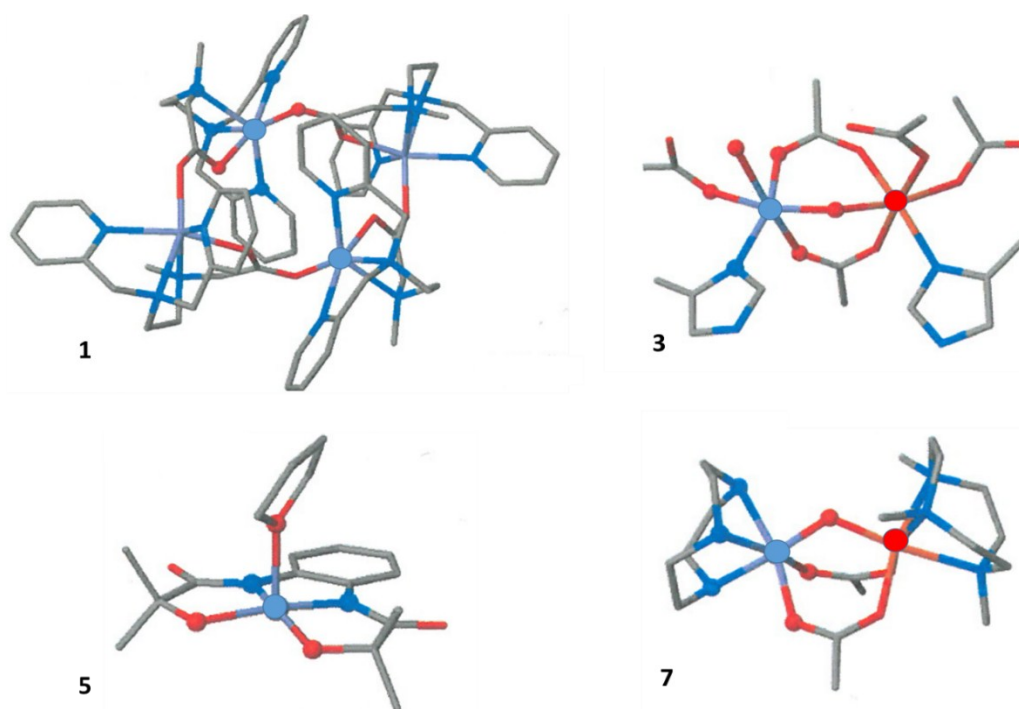

**Figure S1:** Structures of representative examples of O-N ligated Mn Compounds of Dau et al., used for  $K\beta_{1,3}$  calibration in [17] (from Fig. S2 in Dau et al.). Compound 5 is 5-co-ordinate. Compounds 3,7 are mixed metal. Colour coding is; Mn (violet), Fe (bright red), O red, N (blue), C (grey). Protons omitted

**Table S2:** Model Mn compound data of Yachandra et al et al., showing oxidation states, ligand environment and  $K\beta_{1,3} \langle E \rangle$  and  $E_0$  values. Data from [12b] for oxo bridged dimeric complexes (compounds 1-5) and for oxo bridged trimeric and tetrameric species (compounds 6-9) [12d]. See Fig S2 below

| Compound <sup>[a]</sup> | Ox. States(s)         | Ligands                                                                | $\langle E \rangle$ eV | $E_0$ <sup>[b]</sup> eV |
|-------------------------|-----------------------|------------------------------------------------------------------------|------------------------|-------------------------|
| 1                       | (III) <sub>2</sub>    | MnO <sub>2</sub> N <sub>4</sub>                                        | 6490.39                | 6491.32                 |
| 2                       | (III,IV)              | MnO <sub>2</sub> N <sub>4</sub>                                        | 6490.18                | 6490.88                 |
| 3                       | (IV) <sub>2</sub>     | MnO <sub>2</sub> N <sub>4</sub>                                        | 6489.96                | 6490.44                 |
| 4                       | (III,IV)              | MnO <sub>2</sub> N <sub>4</sub>                                        | 6490.21                | 6491.12                 |
| 5                       | (IV) <sub>2</sub>     | MnO <sub>2</sub> N <sub>4</sub>                                        | 6490.01                | 6490.70                 |
| 6                       | (II,III) <sub>2</sub> | (Mn <sup>III</sup> O <sub>5</sub> N)(Mn <sup>II</sup> O <sub>6</sub> ) | 6490.63                | -                       |
| 7                       | (III) <sub>3</sub>    | MnO <sub>5</sub> N                                                     | 6490.51                | -                       |
| 8                       | (II,III) <sub>3</sub> | MnO <sub>4</sub> N <sub>2</sub>                                        | 6490.54                | -                       |
| 9                       | (III) <sub>4</sub>    | MnO <sub>4</sub> N <sub>2</sub>                                        | 6490.45                | -                       |

[a] Compounds 1-3 mono  $\mu$ -oxo bridged. Compounds 4-5 di  $\mu$ -oxo bridged. [b] Estimated from Fig. 8 in [12b].

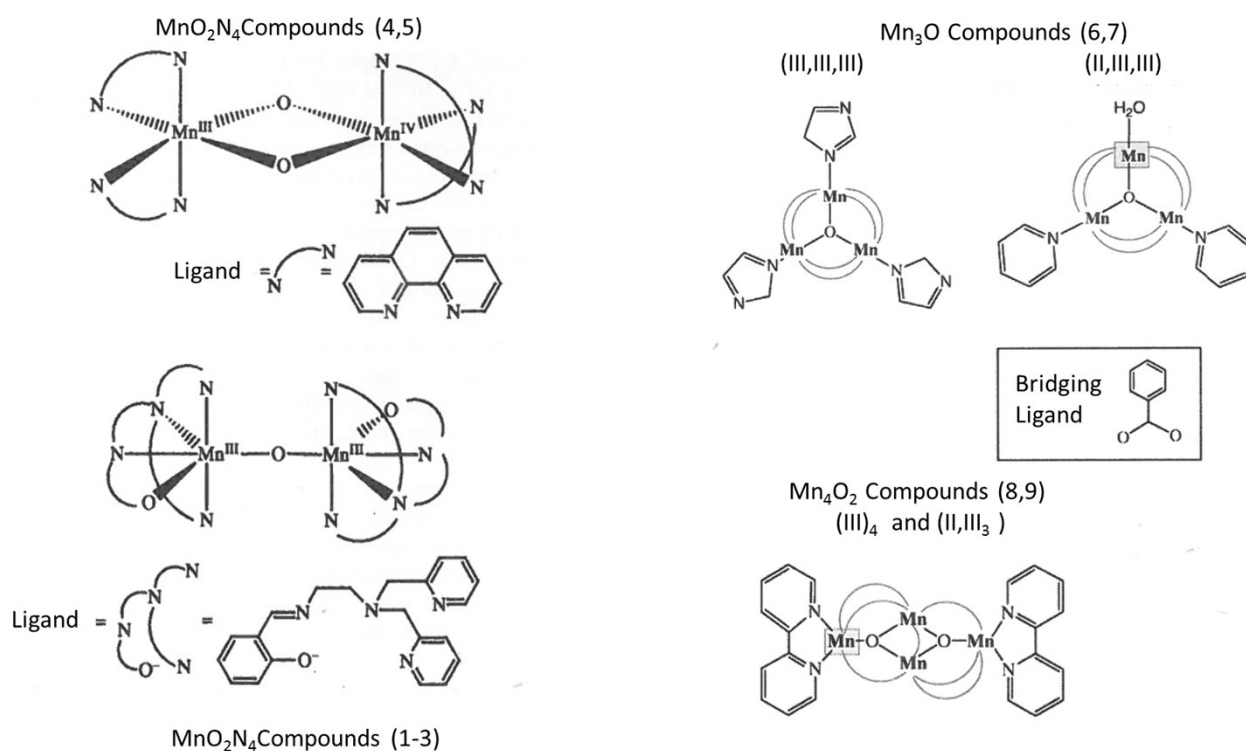

Figure **S2** Structure schematics for O-N ligated Mn Compounds of Yachandra et al., used for  $K\beta_{1,3}$  calibration in Figs 4,5 present text. (From Fig. 2 in [12b] and Fig. 2 in [12d]). Numbering as in Table **S2** above. Protons omitted

**Table S3:** Model Mn compound data of Pushkar al et al. [12f], as for Tables **S1,2** above.

| Compound <sup>[a]</sup> | Ox. States(s)         | Ligands                         | <E> eV  | E <sub>0</sub> <sup>[b]</sup> eV |
|-------------------------|-----------------------|---------------------------------|---------|----------------------------------|
| 1                       | (III,IV)              | MnO <sub>2</sub> N <sub>4</sub> | 6490.29 | 6491.19                          |
| 2                       | (III,IV) <sub>2</sub> | MnO <sub>6</sub>                | 6490.42 | -                                |
| 3                       | (III-IV) <sub>2</sub> | MnO <sub>6</sub>                | 6490.43 | -                                |

[a] Compound 1 is equivalent to compound 4 in Table **S2**. Compounds 2,3 have tri  $\mu$ -oxo bridging and tri phosphinate terminal ligation, see Fig **S3** below. [b] Estimated from Fig. 3 in [12f].

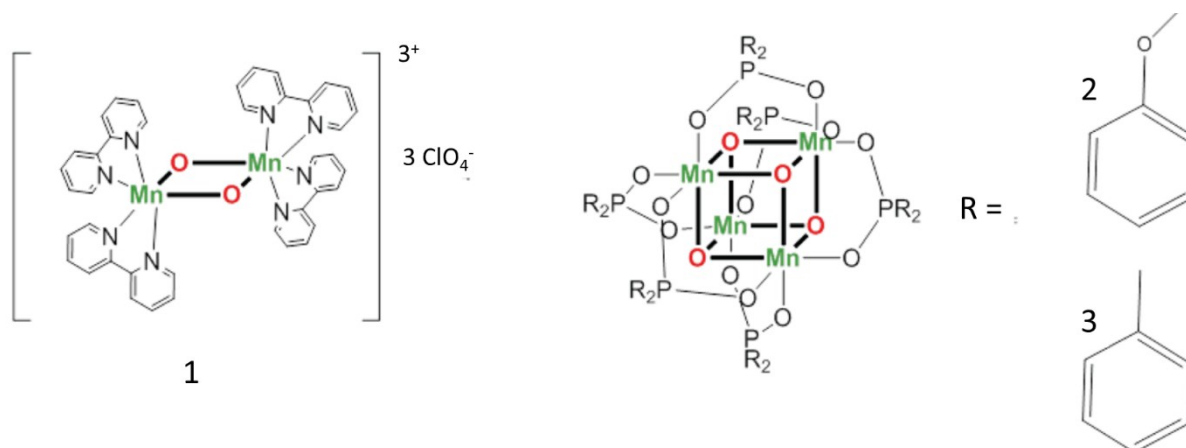

Figure **S3:** Structure schematics for O-N ligated Mn Compounds of Pushkar et al., used for  $K\beta_{1,3}$  calibration in Figs 4,5 present text. (From Fig. 1 in [12f]). Numbering as in Table **S3** above. Protons omitted

**Section S2:  $K\beta'$  and Baseline Offset Effects**

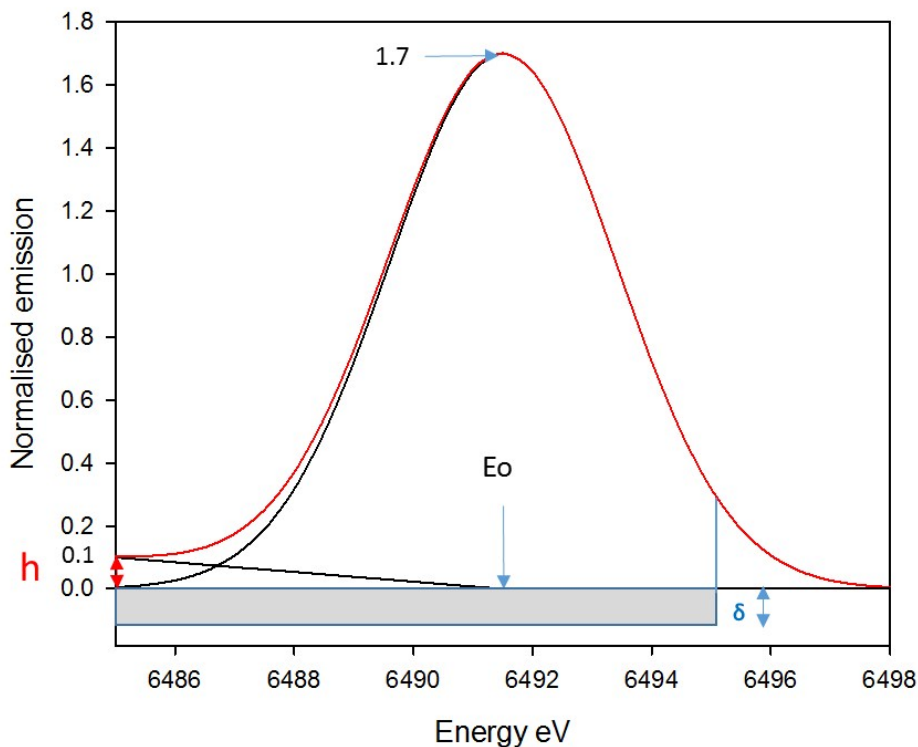

**Fig. S4:** Illustrates schematically the effects of the  $K\beta'$  high energy wing intensity intrusion into the region of the  $K\beta_{1,3}$  emission peak and baseline assignment position. The ‘pure’  $K\beta_{1,3}$  emission (black) is approximated as a simple Gaussian curve ( $E_o = 6491.5$  eV, height  $A_o = 1.7$  units, half height width = 4.5 eV). The  $K\beta'$  edge is approximated as a ‘wedge’ of height  $h$  at 6485 eV, tapering to zero at  $E_o$ . The ‘true’ baseline for these goes through 0 on the emission axis. The blue rectangle, height  $\delta$ , represents the additional emission, included in the  $\langle E \rangle$  integral determination (from 6485 to 6495 eV), from variation in assigned baseline. Red curve is the total for  $K\beta'$  and  $K\beta_{1,3}$  intensities. The ‘true’  $\langle E \rangle$  value is  $E_o$ , ie 649.50 eV.

The quantitative effects of the  $K\beta'$  and baseline effects for the above illustrative example, are indicated below:

let  $E_o = (E_o - 6485) = 6.50$  eV here,

Then for the  $K\beta'$  effect, the apparent shift ( $\Delta\langle E_o \rangle$ ) in the estimated  $\langle E \rangle$  value is given by :

$$\Delta\langle E_o \rangle \sim E_o - (h \cdot E_o^2 / 6 + \text{Area}_g \cdot E_o) / (\text{Area}_g + h \cdot E_o / 2) \dots\dots\dots 1)$$

where  $\text{Area}_g$  is the total area of the Gaussian curve up to the upper integration limit of 6495 eV. For the case above this is  $\sim 8.0$  units (varies somewhat with  $E_o$  position)

For the baseline effect, the corresponding  $\Delta\langle E_o \rangle$  value is given by :

$$\Delta\langle E_o \rangle \sim E_o - [(50 \cdot \delta + \text{Area}_g \cdot E_o) / (\text{Area}_g + 10 \cdot \delta)] \dots\dots\dots 2)$$

If  $h \sim 0.1$  and  $\delta/A_0 \sim 0.1$ , (see main text), then both equations 1) and 2) separately predict  $\Delta\langle E_0 \rangle$  values of  $\sim 0.2$ - $0.3$  eV, depending on the precise  $E_0$  position, actual Gaussian width etc. In both cases, the perturbations produce an apparent  $\langle E \rangle$  value which is **Lower** than the 'true'  $E_0$  value, i.e. correspond to an apparently *Higher* Mn oxidation state.

### Section S3: Turnover Difference Baseline Levelling

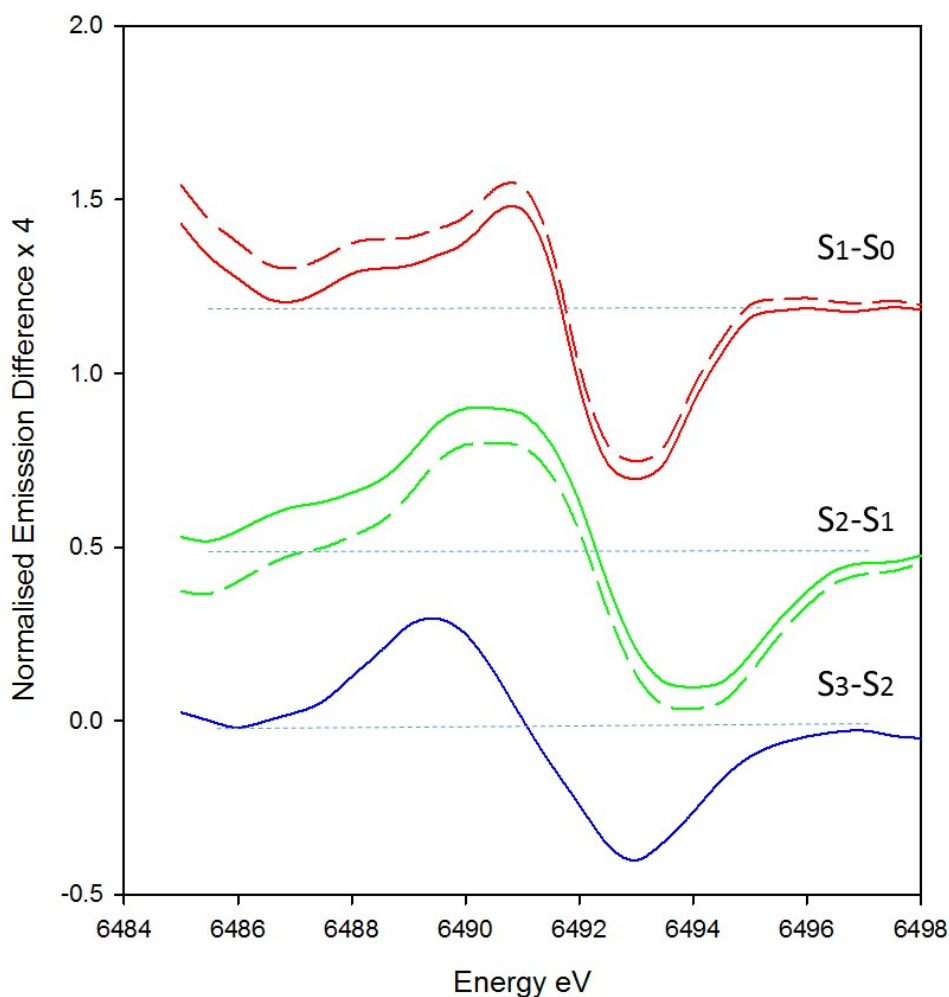

**Fig. S5:** Shows levelled curves (full) and raw unlevelled curves (dashed) for S state turnover difference spectra of Dau et al. [17] (see also main text). Levelling was by linear baseline adjustment, as indicated by dotted lines. This is reasonable for the  $S_2$ - $S_1$  spectrum, but the  $S_1$ - $S_0$  spectrum likely shows evidence of a non linear intrusion of  $K\beta'$  intensity into the energy region below  $\sim 6488$  eV, which is substantially greater in the  $S_1$  spectrum than in the  $S_0$  spectrum. This effect is essentially absent in the other two turnover difference spectra, suggesting that the extra  $K\beta'$  intensity largely cancels between successive S states up to  $S_3$  (i.e. is equally present in those states). All of these effects however, have very little influence on the estimation of the central inflection point energies (typically  $< 0.1$  eV).

**Section S4:** PS II RIXS Data of Yachandra et al. [13].

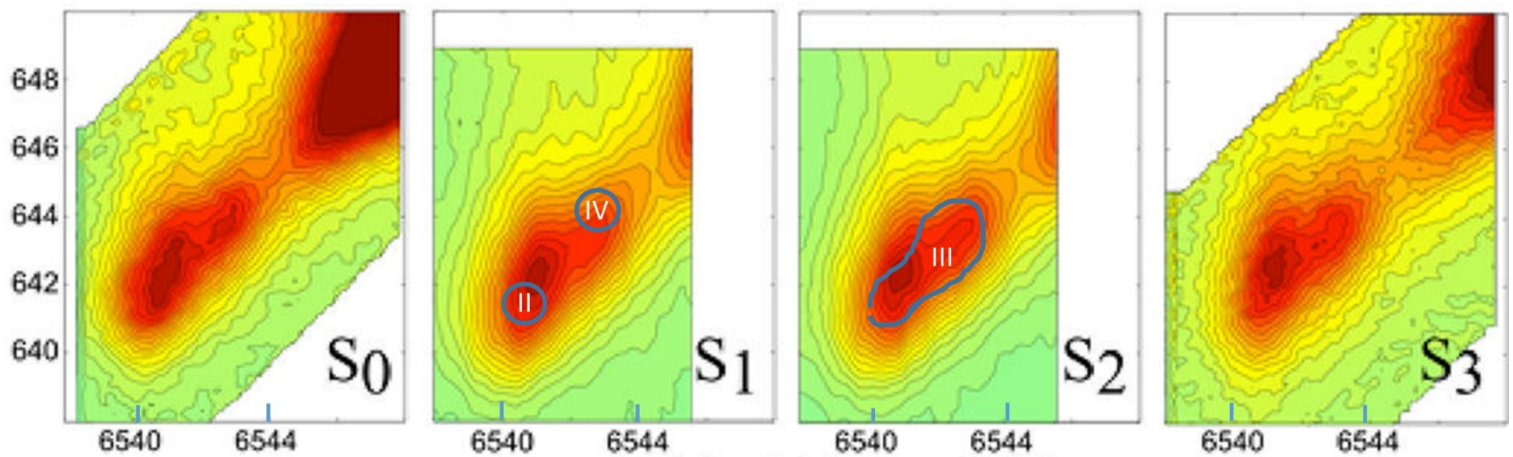

**Fig S6:** Reproduced Mn RIXS plots for the de-convoluted S states of PS II, with axis identifications as described in main text and refs [13]. Overlaid on the S<sub>1</sub> plot are the principal RIXS peak positions for Mn(II) (MnO) and Mn(IV) compounds from [13b], with mainly O ligation (see main text). The extended region overlaying the S<sub>2</sub> plot is for Mn<sub>2</sub>O<sub>3</sub> (Mn(III)), from [13a].
